# Supplementary material
Source: HighWire-hosted journal article supplement (https://cmaj.ca/highwire/filestream/57853/field_highwire_adjunct_files/0/drug-dumont-1-at.pdf)
Supplement: drug-dumont-1-at.pdf [file drug-dumont-1-at.pdf]

## Appendix 1 (as provided by authors): Drug-facilitated sexual assault study screening form

### NOTE TO HEALTH CARE PROVIDERS:

This form is to be used with all clients. Please let clients know that while some questions might be perceived as sensitive, all questions will be posed to every client without exception for the purposes of gathering information for future outreach and programming. Clients must also be advised that they are free to *decline* to answer any question if they do not wish to provide an answer.

CLIENT NUMBER \_\_\_\_\_

### Client Information

1. Date and time of presentation: \_\_\_\_\_  
DD MM YYYY HH : MM

2. Age: \_\_ \_\_

3. Sex: Female Male Transgender

4. Cultural/Ethnic background: \_\_\_\_\_ Declined

5. Living Situation: Alone With family With non-relatives With partner/husband  
 Shelter Institution Other \_\_\_\_\_ Declined

6. Employed:   
 No Social Assistance/Welfare  
Disability Other \_\_\_\_\_ Declined  
 Yes Full-time  
Part-time Declined

7. Student: Yes No Declined

8. Mental health problems within the past 6 months: Yes No Declined

Specify: \_\_\_\_\_

9. Physical and/or cognitive disabilities: Yes No Declined

Specify: \_\_\_\_\_

**Sexual Assault**

10. Does client suspect that s/he has been sexually assaulted?
- A. Knows s/he has been sexually assaulted (if yes, go to 11)
  - B. Suspects s/he has been sexually assaulted (does not know what happened)

↓

*The following reasons for suspected sexual assault were given (check all that apply):*

- a. Vague sensation that something is wrong/something sexual has happened
- b. Woke to find her/his clothing in disarray or unclothed
- c. Unexplained body fluids (e.g. semen) and/or foreign materials (e.g. used condom, dirt/grass) were found on the client's body or nearby
- d. Unexplained genital/anal/oral bleeding and/or bruising
- e. Unexplained bodily injuries (e.g. scratches, bruising)
- f. Woke to find uninvited person in bed and/or woke in a strange place
- g. Witness reported seeing client in compromised circumstances that client does not remember
- h. Other \_\_\_\_\_
- i. No valid reason given [NOTE: client **not** eligible for study]

**Assault History**

11. Approximate date and time: \_\_\_\_\_

DD    MM    YYYY    HH : MM

|                      |                               |     |    |            |
|----------------------|-------------------------------|-----|----|------------|
| 12. Type of assault: | Kissing/Fondling              | Yes | No | Don't know |
|                      | Cunnilingus/Fellatio          | Yes | No | Don't know |
|                      | Oral/Anal/Vaginal Penetration | Yes | No | Don't know |

13. Physical injuries?    Yes                  No                  Don't know

14. Weapons?            Yes                  No                  Don't know

**Alcohol**

15. Was alcohol consumed by the client prior to the sexual assault?

Yes    No    Doesn't know    Declined

**Drugs**

16. Within the previous 72 hours, did the client consume any:

A. Prescription medication(s)?

No                  Yes                  \_\_\_\_\_ → List: \_\_\_\_\_

Approximate time taken: \_\_\_ : \_\_\_

Doesn't remember

Declined

H H : M M

B. Over-the-counter medication and/or herbal preparations (e.g. cough syrup, Gravol, St. John's Wort)?

No

Yes

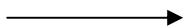

List: \_\_\_\_\_

Approximate time taken: \_\_\_ : \_\_\_

Doesn't remember

Declined

H H : M M

C. Street drugs (e.g. solvent abuse, illicit drugs such as marijuana, cocaine, etc)?

No

Yes

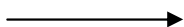

List: \_\_\_\_\_

Approximate time taken: \_\_\_ : \_\_\_

Doesn't remember

Declined

H H : M M

**17. Client *suspects* s/he has been drugged.**

A. Yes

B. No ( go to question 18)

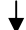

*The following reasons for suspected drugging were given (check all that apply):*

a. Total amnesia

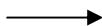

Time of waking up: \_\_\_\_\_  
Time of last memory: \_\_\_\_\_

b. Partial amnesia

c. Conscious paralysis (immobilized but aware)

k. Disinhibition

d. Loss of consciousness/blacked out

l. Delirium/hallucinatory state

e. Slurred speech

m. Impaired judgment

f. Impaired vision

n. Dizziness/lightheadedness

g. Drowsiness

o. Impaired motor skills

h. Confusion

p. Nausea/vomiting

i. Hangover/symptoms inconsistent  
with amount of alcohol/drugs consumed

q. Witness reported seeing client acting  
inconsistently with personality and/or  
amount of alcohol/drugs consumed

j. No valid reason given [NOTE: client **not** eligible for study]

r. Other: \_\_\_\_\_

18. Based on your experience as an examiner, do you think a DFSA has occurred?

Yes

No

**Time Frame**

19. Has client presented within approximately 72 hours?    Yes    No    Not sure  
(client still eligible for study)

20. Client eligible for study:    Yes    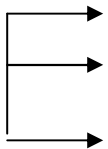    Admitted to study  
[answered yes to 10B, 17A (with valid    Client Declined  
reasons) and yes or not sure to 19]    Client not asked (reason)\_\_\_\_\_

No
